# Supplementary material
Source: PubMed Central journal article supplement (PMC3104126)
Supplement: NIHMS292231-supplement-01.pdf [file NIHMS292231-supplement-01.pdf]

## Supplemental Figure 1

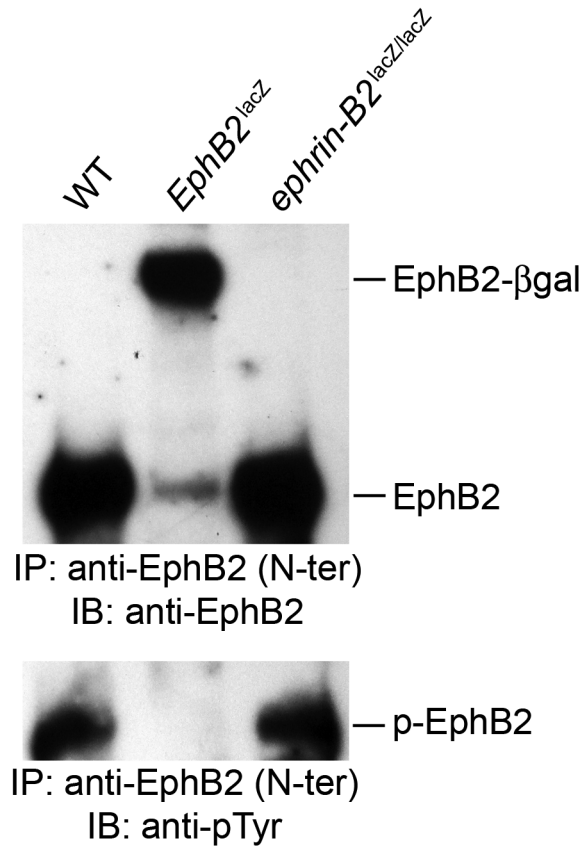

### Supplemental Figure 1.

Whole cell protein lysates from the heads of WT, *EphB2*<sup>lacZ/lacZ</sup>, and *ephrin-B2*<sup>lacZ/lacZ</sup> embryos collected at E13.5 were immunoprecipitated with an antibody directed against the N-terminal extracellular domain of EphB2 and then immunoblotted with the same antibody (top) and with an anti-phospho-tyrosine antibody (bottom). The data shows no obvious difference in tyrosine phosphorylation of EphB2 when the ephrin-B2-βgal fusion protein is expressed compared to ephrin-B2 protein in the WT. The *EphB2*<sup>lacZ/lacZ</sup> lane serves as the control with the faint band in the top blot indicating a small amount of cross reactivity of the anti-EphB2 (N-ter) antibody with other co-expressed EphB proteins.

## Supplemental Figure 2

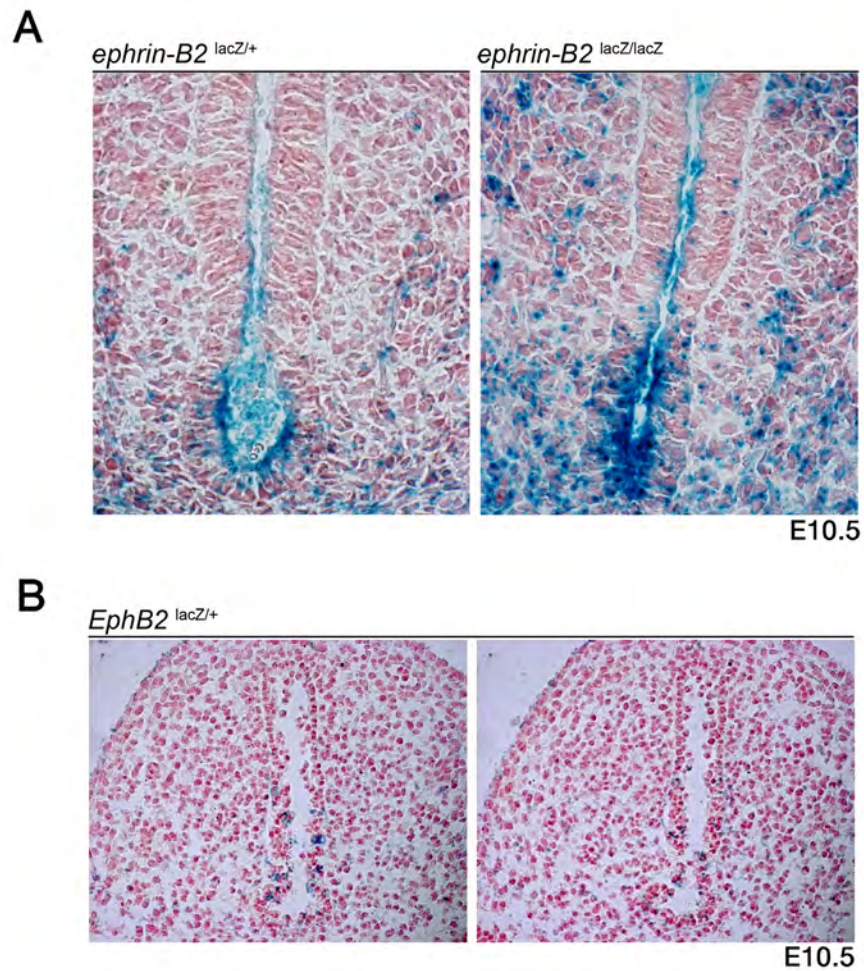

### Supplemental Figure 2.

(A) Higher magnification images of pre-septation foregut stained with X-gal from *ephrin-B2*<sup>lacZ/+</sup> (left) and *ephrin-B2*<sup>lacZ/lacZ</sup> (right) E10.5 embryos.

(B) BluO-gal stain (blue) of E10.5 *EphB2*<sup>lacZ/+</sup> foregut before (left) and at septation (right).

### Supplemental Figure 3

**A**

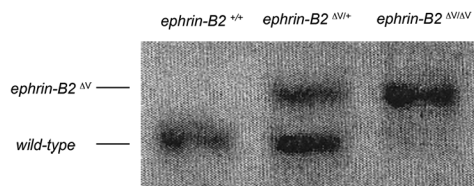

**B**

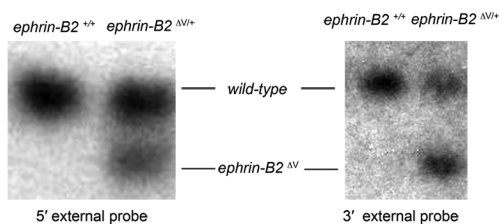

**C**

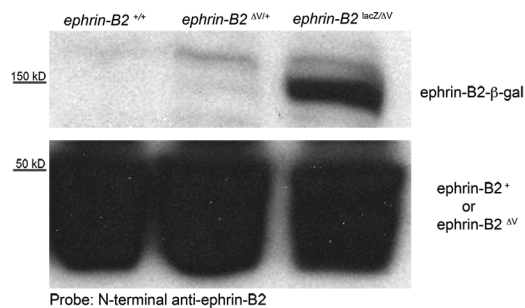

#### Supplemental Figure 3.

(A) PCR products from genomic DNA from WT, *ephrin-B2*<sup>ΔV/+</sup>, and *ephrin-B2*<sup>ΔV/ΔV</sup> tissue.

(B) Southern blot screen indicating positive targeting of the 5' and 3' homology arms

(C) Whole cell protein lysates from E12.5 WT, *ephrin-B2*<sup>ΔV/+</sup>, and *ephrin-B2*<sup>lacZ/ΔV</sup> embryos immunoblotted with an antibody against ephrin-B2 indicate proper expression of the ephrin-B2-ΔV protein as determined by the presence of the 45 kD band in the ephrin-B2<sup>lacZ/ΔV</sup> sample (lane 3).
